# Supplementary material
Source: PubMed Central journal article supplement (PMC2605652)
Supplement: NIHMS69361-supplement-1.pdf [file NIHMS69361-supplement-1.pdf]

**SUPPLEMENTARY INFORMATION**

**A central role for *Islet1* in sensory neuron development linking sensory and spinal gene regulatory programs**

Yunfu Sun, Iain M. Dykes, Xingqun Liang, S. Raisa Eng, Sylvia M. Evans and Eric E. Turner

**Supplementary Figure 1**

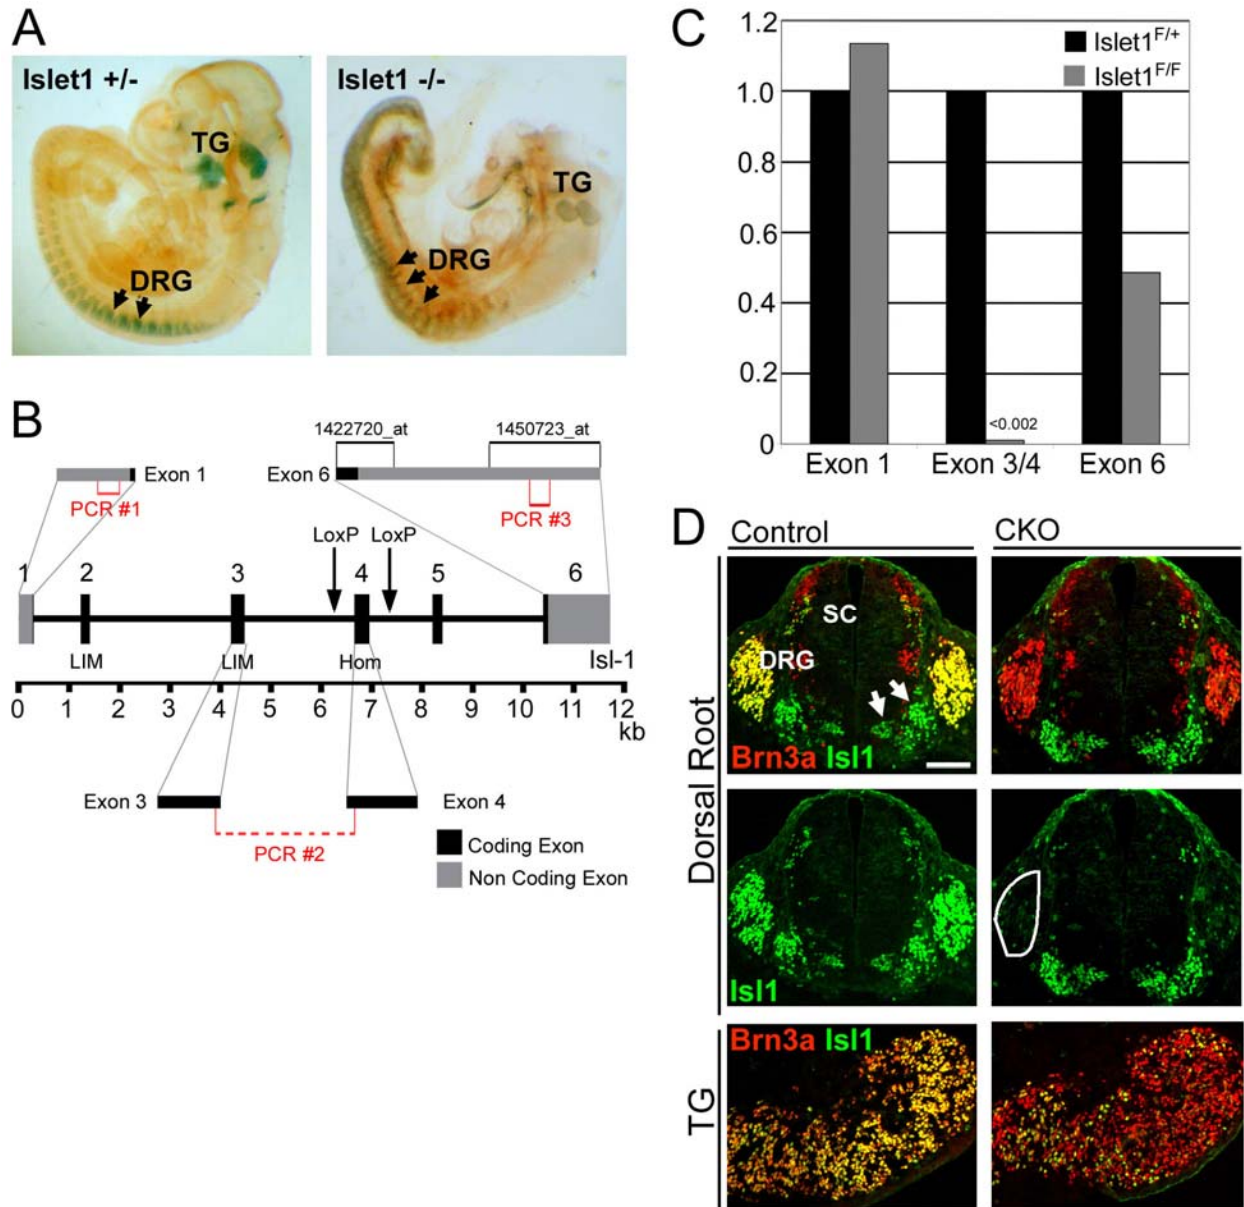

**Supplementary Figure 1. A strategy for tissue-specific deletion of *Islet1* in the sensory system.**

(A) Development of the sensory nervous system in a conventional *Islet1* null embryo and heterozygous control, at E10.5. The *Islet1*<sup>-/-</sup> embryo is no longer viable, and the dorsal forebrain-midbrain has been lost due to necrosis. However, initial formation of the DRG and TG at the appropriate locations can be visualized by Xgal staining due to the presence of a *Brn3a*<sup>tauLacZ</sup> reporter. (B) Strategy for the conditional deletion of the *Islet1* homeodomain. Exon 4, encoding the homeodomain, is flanked by *loxP* sites. The location of sequences assayed by Affymetrix probe sets from the mouse genome 430 array and RT-PCR primers are shown. Details of the generation of floxed *Islet1* mice will be published elsewhere. (C) RT-PCR primers targeting Exon 1, Exon 3-4 and Exon 6 were used to assay *Islet1* mRNA in the E12.5 DRG of *Islet1*<sup>F/+</sup> (control) and *Islet1*<sup>F/F</sup> (CKO) mice in the presence of a *Wnt1-Cre* allele. Exon 1 levels in CKO ganglia were equal to controls, indicating that the recombined locus was expressed at normal levels. Exon 4 sequences were detected at less than 1% of normal levels, demonstrating highly efficient excision by *Wnt1-Cre*. Exon 6 sequences were present at reduced levels, indicating that the mRNA expressed from the targeted allele was spliced but with lower efficiency than the native mRNA. (D) Immunofluorescence staining for the expression of *Islet1* protein in horizontal sections of E12.5 of control and CKO DRG and TG. *Brn3a* is normally co-expressed with *Islet1* in a large majority of sensory neurons, is not significantly changed in the knockout ganglia, and is used here as a marker for the sensory population. *Islet1* protein was nearly absent from E11.5 DRG, but it continued to be expressed in the TG in a subset of sensory neurons which may be derived from the trigeminal placodes rather than the neural crest, and thus do not express the *Wnt1-cre* transgene. Expression of *Islet1* in motor neurons (arrows) is not affected. Scale (D) 200μm.

Supplementary Figure 2

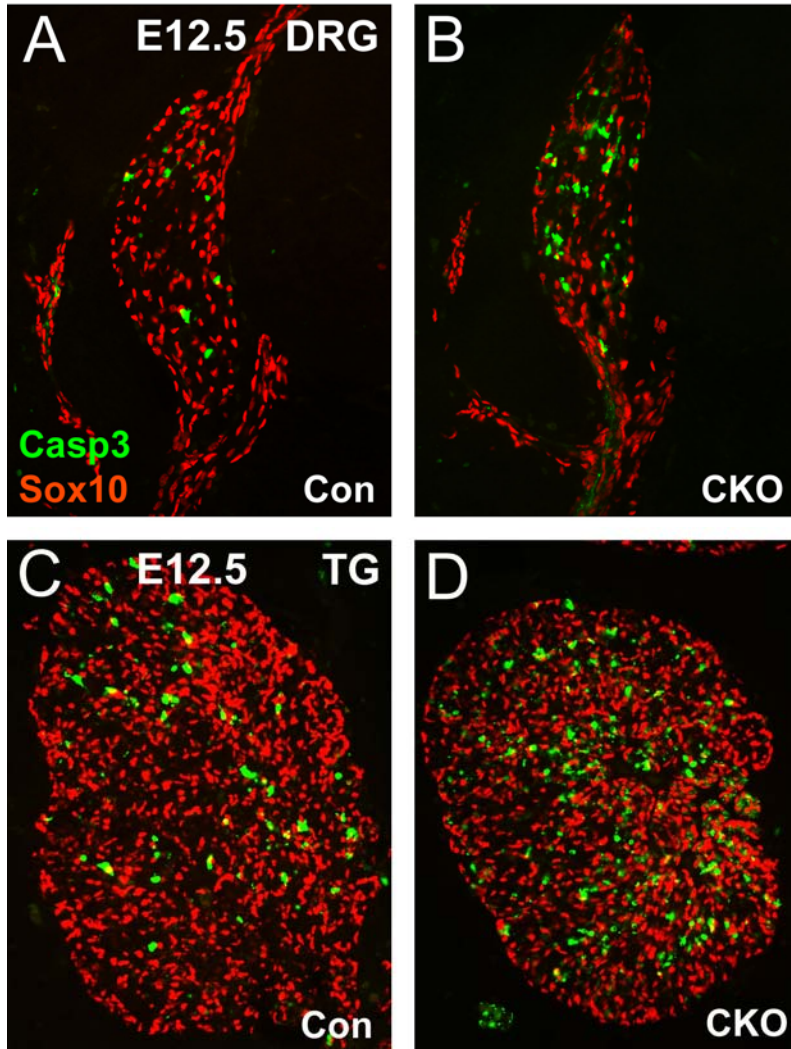

**Supplementary Figure 2. Increased cell death in the sensory ganglia of Islet1 CKO embryos.** Immunofluorescence for Caspase-3 was used to identify cells undergoing apoptotic cell death in E12.5 DRG and TG from Islet1 control and CKO embryos. Caspase-3 rarely localized with Sox10, indicating that cell death occurs primarily in differentiating neurons rather than precursors. (A,B) Apoptosis in DRG. (C,D) Apoptosis in TG. Analysis of cell counts appears in Figure 1.

### Supplementary Figure 3

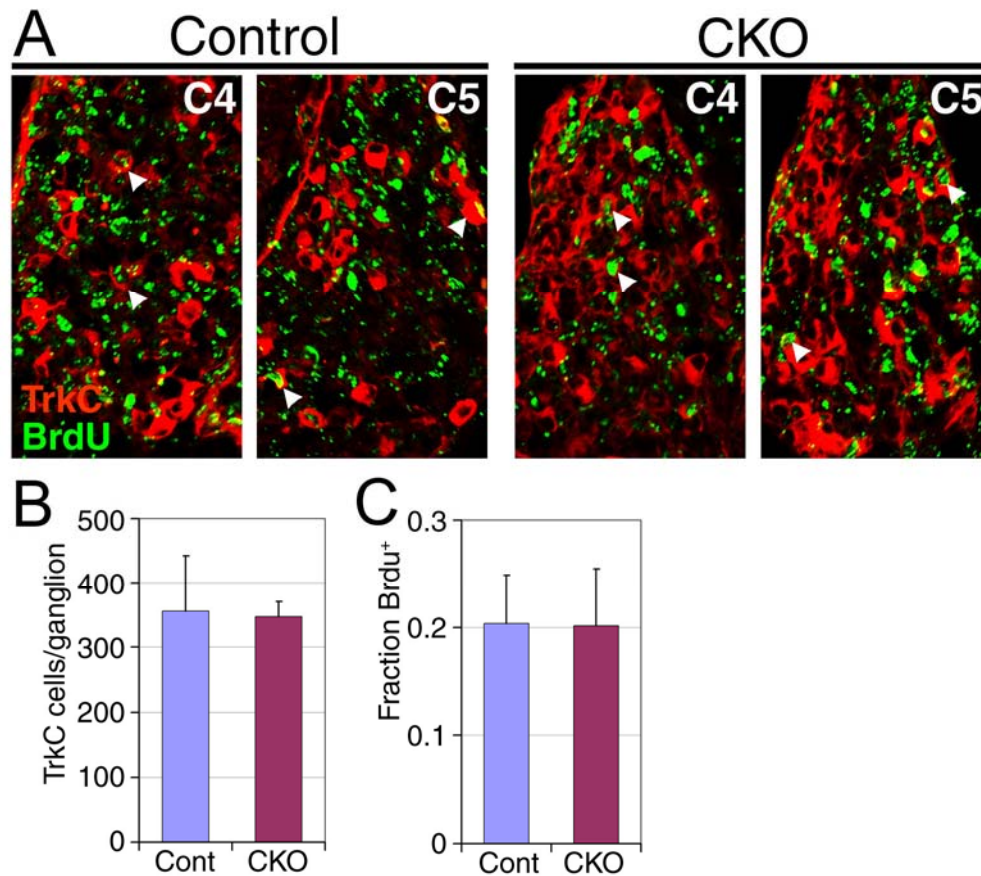

### Supplementary Figure 3. Birthdating TrkC neurons in Islet1 CKO and control DRG.

Pregnant dams were injected with BrdU at E10.5, and embryos were harvested at E15.5.

Immunofluorescence was performed for TrkC and BrdU in all sections from C3 to C6 in littermate embryos. (A) Immunofluorescence for TrkC and BrdU. C4, C5 indicate axial level of DRG shown. Arrows indicate examples of labeled nuclei in TrkC immunoreactive cells. (B,C) TrkC and BrdU expressing cell counts for cervical ganglia C3 to C6. CKO ganglia were markedly diminished in size but contained similar numbers of TrkC neurons, and a similar fraction of TrkC neurons were strongly labeled at E10.5.

**Methods for Supplementary Figure 3:** Birthdating of DRG neurons was performed by injecting timed-pregant dams at noon and 4PM of E10.5 with 500 $\mu$ l of BrdU (proprietary

mixture, Ambion). Embryos were harvested at E15.5 and the vertebral columns with attached DRGs were fixed in 4% PFA at RT for 3 hours and processed for cryosectioning. For coimmunostaining of BrdU and TrkC, TrkC staining was performed first as described above and the slides were then dehydrated in graded ethanol solutions, air dried, treated with 4N HCL for 20 min, washed extensively in PBS and stained with antibody to BrdU (Abcam, Rat anti-mouse, 1:100) followed by appropriate secondary antibodies. Cells immunoreactive for TrkC and BrdU, which displayed a clear nuclear outline in the plane of section and strong labeling for BrdU indicative of cell cycle exit during the period of labeling, were counted in every fourth section throughout the cervical DRG in matched sections of control and CKO embryos.

#### Supplementary Figure 4

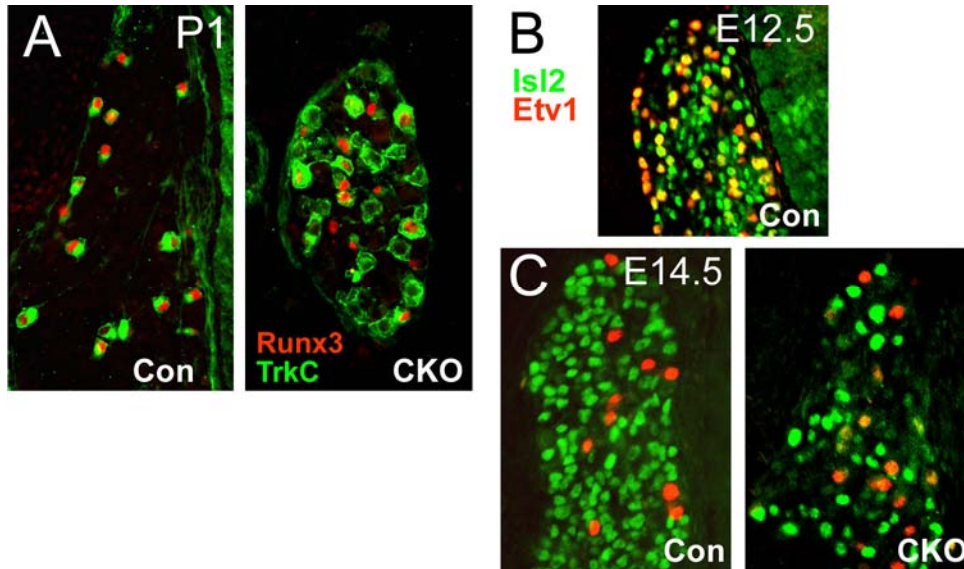

**Supplementary Figure 4. Subtype specific transcription factor expression in Islet1 CKO DRG.** (A) Co-expression of Runx3 and TrkC in control ganglion vestigial CKO ganglion at P1. (B,C) Expression of Islet2 and Etv1. At E12.5 these markers are co-expressed in a significant fraction of DRG neurons, but at E14.5 Etv1 neurons no longer express Islet2 in both the control and CKO DRG.

Supplementary Figure 5

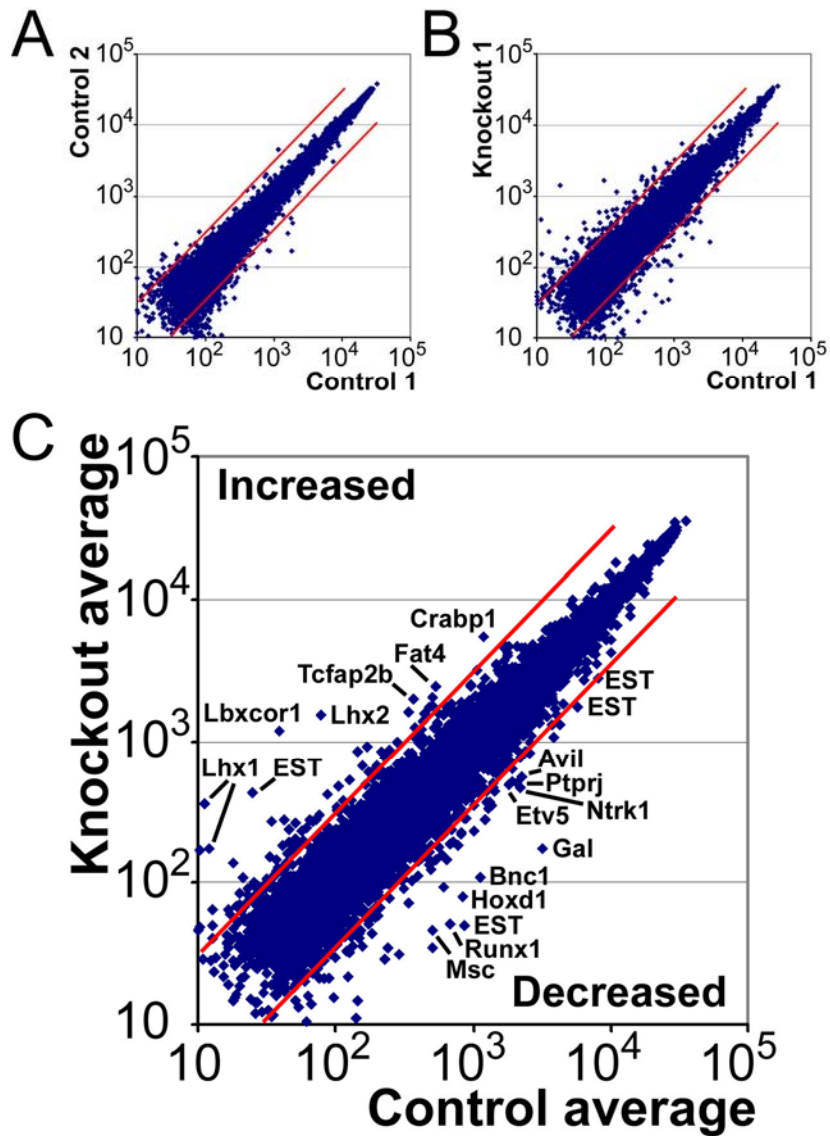

**Supplementary Figure 5. Global comparison of gene expression in *Islet1* knockout and control DRG.** Cervical/upper thoracic DRG were harvested from E12.5 embryos with the genotypes *Islet1*<sup>F/+</sup>, *Wnt1-Cre* (control) and *Islet1*<sup>F/F</sup>, *Wnt1-Cre* (knockout) as described in Methods. Data from two independent experiments were analyzed using MAS 5.0, and expression levels for all transcripts present in at least one condition were compared. Parallel red lines indicate three-fold change. (A) Replicate assays of control ganglia were highly correlated. The small number of differentially expressed genes could in several cases be identified as sex chromosome-linked transcripts related to embryo gender. (B,C) Comparison of transcript levels

in control and knockout DRG showed significant and highly reproducible changes in gene expression for a small number of transcripts.



Supplementary Figure 6

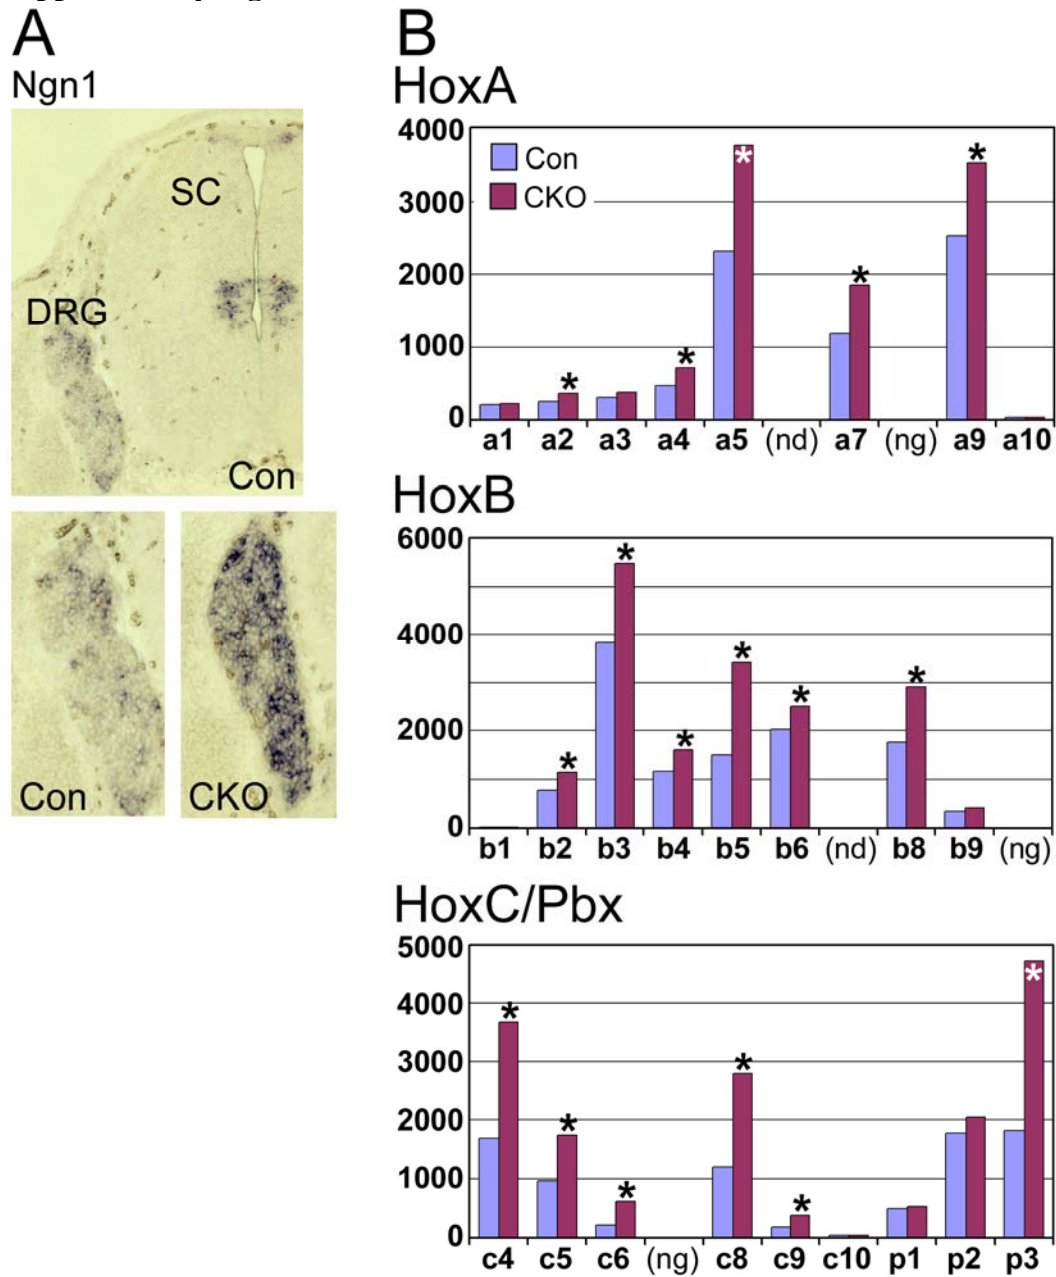

**Supplementary Figure 6. Regulation of Neurogenin1, Hox and Pbx genes by Islet1. (A)**

Ngn1 (Neurog1) expression in the cervical DRG of E12.5 *Islet1* control and CKO embryos.

Ngn1 is also expressed in a subset of spinal cord neuron precursors. Views are of littermate

embryos processed together on the same slide. **(B)** Multiple transcripts of the *HoxA*, *B*, and *C*

clusters are increased in the DRG of *Islet1* CKO embryos. Asterisks indicate significant increase

or decrease (change  $p < 0.002$  or  $> 0.998$ ) in two concordant comparisons. Nd, not determined;

ng, no gene at the corresponding position in cluster.

**Supplementary Table 1.**

| Wnt1<br>-Cre<br>fold | Symbol  | Replicate 1 |       |        | Replicate 2 |       |        | Mean values |           |                    |
|----------------------|---------|-------------|-------|--------|-------------|-------|--------|-------------|-----------|--------------------|
|                      |         | Con1        | KO1   | Chg P1 | Con2        | KO2   | Chg P2 | Con<br>avg  | KO<br>avg | Con/<br>KO<br>fold |
| 32.3                 | Lhx1    | (12)        | (6)   | n.s.   | (12)        | (9)   | n.s.   | n.s.        | n.s.      | n.s.               |
| 30.4                 | Sall3   | (10)        | (3)   | n.s.   | (15)        | (15)  | n.s.   | n.s.        | n.s.      | n.s.               |
| 30.2                 | Lbxcor1 | (12)        | (4)   | n.s.   | (72)        | (26)  | n.s.   | n.s.        | n.s.      | n.s.               |
| 19.5                 | Lhx2    | 103         | 162   | n.s.   | (157)       | 200   | n.s.   | 130         | 181       | 1.4                |
| 7.6                  | Olig2   | (25)        | (3)   | n.s.   | (13)        | (12)  | n.s.   | n.s.        | n.s.      | n.s.               |
| 5.8                  | Stxbp6  | 173         | 124   | n.s.   | 253         | 251   | n.s.   | 213         | 187       | 0.9                |
| 5.4                  | Tcfap2b | 119         | (109) | n.s.   | (77)        | (100) | n.s.   | n.s.        | n.s.      | n.s.               |
| 5.1                  | Daam1   | 228         | 239   | n.s.   | 262         | 259   | n.s.   | 245         | 249       | 1.0                |
| 4.8                  | Nova1   | 325         | 302   | n.s.   | 169         | 256   | n.s.   | 247         | 279       | 1.1                |
| 4.6                  | Fat4    | 268         | 253   | n.s.   | 270         | 279   | n.s.   | 269         | 266       | 1.0                |
| 4.5                  | Crabp1  | 5598        | 6328  | n.s.   | 7047        | 6966  | n.s.   | 6322        | 6647      | 1.0                |
| 4.2                  | Mpeg1   | 373         | 280   | n.s.   | (61)        | (159) | n.s.   | 217         | 220       | 1.0                |
| 4.0                  | Gpm6a   | 1355        | 1482  | n.s.   | 1038        | 1303  | n.s.   | 1197        | 1393      | 1.2                |
| 4.0                  | Glra2   | 206         | 202   | n.s.   | 222         | (120) | n.s.   | 214         | 161       | 0.8                |
| 3.6                  | Pcdh20  | (24)        | (36)  | n.s.   | (97)        | (32)  | n.s.   | n.s.        | n.s.      | n.s.               |
| 3.5                  | Elmod1  | 77          | 96    | n.s.   | (128)       | 127   | n.s.   | 102         | 111       | 1.1                |
| 3.5                  | Olig1   | (17)        | (5)   | n.s.   | (13)        | (15)  | n.s.   | n.s.        | n.s.      | n.s.               |
| 3.5                  | Ctss    | 654         | 527   | n.s.   | 468         | 459   | n.s.   | 561         | 493       | 0.9                |
| 3.4                  | Pcdh9   | 970         | 1028  | n.s.   | 779         | 781   | n.s.   | 875         | 904       | 1.0                |
| 3.4                  | Pira2   | (22)        | (24)  | n.s.   | (29)        | (149) | n.s.   | n.s.        | n.s.      | n.s.               |
| 3.3                  | Dab1    | 95          | 129   | n.s.   | (159)       | 104   | n.s.   | 127         | 116       | 0.9                |
| 3.3                  | Dach2   | 141         | 155   | n.s.   | (110)       | (188) | n.s.   | n.s.        | n.s.      | n.s.               |
| 3.2                  | Eya1    | 116         | 143   | n.s.   | 245)        | 171   | n.s.   | 180         | 157       | 0.9                |
| 3.0                  | Neurod4 | (2)         | (4)   | n.s.   | (14)        | (16)  | n.s.   | n.s.        | n.s.      | n.s.               |
| 2.9                  | Kcnd2   | 187         | 186   | n.s.   | (145)       | 158   | n.s.   | 166         | 172       | 1.0                |
| 2.9                  | Shox2   | 225         | 129   | n.s.   | 132         | 193   | n.s.   | 178         | 161       | 0.9                |
| 2.8                  | Ror1    | 203         | 209   | n.s.   | 239         | 241   | n.s.   | 221         | 225       | 1.0                |
| 2.8                  | Hoxc6   | (44)        | (77)  | n.s.   | (35)        | (29)  | n.s.   | n.s.        | n.s.      | n.s.               |
| 2.7                  | Insm1   | 353         | 351   | n.s.   | 455         | 480   | n.s.   | 404         | 416       | 1.0                |
| 2.7                  | Neurog1 | (25)        | (8)   | n.s.   | (25)        | (30)  | n.s.   | n.s.        | n.s.      | n.s.               |

**Supplementary Table 1. Expression of transcripts in the E14.5 TG of *Islet1*<sup>MCM/F</sup> tamoxifen-induced (IKO) embryos, ranked by the order of transcripts most increased in E12.5 CKO**

**ganglia.** Expression of the transcripts most increased in E12.5 CKO DRG (Table 1) were examined in IKO trigeminal at E14.5. Pregnant dams were injected with tamoxifen at E11.5 and embryos were harvested at E14.5. Gene expression was compared in replicate samples of *Islet1*<sup>MCM/F</sup> experimental and *Islet1*<sup>F/+</sup> littermate embryos. Values in parentheses are absent calls. Average and fold change values are reported as not significant (n.s.) in the case of absent calls. No significant changes (Change P value) were observed in expression of these genes normally repressed by *Islet1* at early stages. Corresponding gene names appear in Table 1.

Supplementary Table 2.

| Wnt-Cre fold | Symbol              | Replicate 1 |             |                | Replicate 2 |             |                | Mean values |             |             |             |
|--------------|---------------------|-------------|-------------|----------------|-------------|-------------|----------------|-------------|-------------|-------------|-------------|
|              |                     | Con1        | KO1         | Chg P1         | Con2        | KO2         | Chg P2         | Con avg     | KO avg      | Con KO fold | KO % of Con |
| 24.7         | Scn10a              | 236         | 158         | n.s.           | 343         | 288         | n.s.           | 290         | 223         | 1.30        | 77%         |
| 18.4         | <b>Gal</b>          | <b>5678</b> | <b>4137</b> | <b>0.99998</b> | <b>5641</b> | <b>3961</b> | <b>0.99997</b> | <b>5659</b> | <b>4049</b> | <b>1.40</b> | <b>72%</b>  |
| 13.4         | <b>Runx1</b>        | <b>1215</b> | <b>901</b>  | <b>0.99998</b> | <b>1329</b> | <b>779</b>  | <b>0.99983</b> | <b>1272</b> | <b>840</b>  | <b>1.51</b> | <b>66%</b>  |
| 12.6         | Cckar               | 108         | 78          | 0.99965        | 185         | 93          | n.s.           | 146         | 85          | 1.71        | 58%         |
| 10.8         | Msc                 | 166         | 118         | 0.99775        | 249         | (200)       | n.s.           | 207         | 159         | 1.31        | 77%         |
| 10.7         | Hoxd1               | 3434        | 3654        | n.s.           | 3473        | 3386        | n.s.           | 3454        | 3520        | 0.98        | 102%        |
| 10.5         | Bnc1                | 4613        | 3803        | n.s.           | 3387        | 2921        | n.s.           | 4000        | 3362        | 1.19        | 84%         |
| 6.6          | Fst                 | 345         | 250         | n.s.           | 231         | 166         | n.s.           | 288         | 208         | 1.38        | 72%         |
| 4.8          | Ntrk1               | 2757        | 2826        | n.s.           | 3739        | 3773        | n.s.           | 3248        | 3299        | 0.98        | 102%        |
| 4.3          | Pla2g7              | 2690        | 2775        | n.s.           | 3255        | 3138        | n.s.           | 2972        | 2956        | 1.01        | 99%         |
| 4.2          | Ptprj               | 564         | 366         | n.s.           | 606         | 494         | n.s.           | 585         | 430         | 1.36        | 73%         |
| 4.1          | Avil                | 7755        | 8081        | n.s.           | 7344        | 7057        | n.s.           | 7550        | 7569        | 1.00        | 100%        |
| 3.9          | Islr2               | 2484        | 2673        | n.s.           | 3908        | 3797        | n.s.           | 3196        | 3235        | 0.99        | 101%        |
| 3.9          | <b>Th</b>           | <b>2825</b> | <b>1694</b> | <b>0.99998</b> | <b>3495</b> | <b>1980</b> | <b>0.99998</b> | <b>3160</b> | <b>1837</b> | <b>1.72</b> | <b>58%</b>  |
| 3.9          | Bmper               | 1366        | 1679        | n.s.           | 1422        | 1493        | n.s.           | 1394        | 1586        | 0.88        | 114%        |
| 3.7          | Ppp1r2              | 2865        | 2665        | n.s.           | 2231        | 2252        | n.s.           | 2548        | 2459        | 1.04        | 96%         |
| 3.7          | Lix1                | 1269        | 1137        | n.s.           | 1296        | 1284        | n.s.           | 1282        | 1211        | 1.06        | 94%         |
| 3.7          | Etv5                | 1860        | 1789        | n.s.           | 1532        | 1490        | n.s.           | 1696        | 1640        | 1.03        | 97%         |
| 3.7          | Fmn1                | 531         | 450         | n.s.           | 432         | 358         | n.s.           | 481         | 404         | 1.19        | 84%         |
| 3.7          | Prokr1 <sup>1</sup> | 763         | 533         | 0.99998        | 565         | 686         | 0.99965        | 664         | 609         | 1.09        | 92%         |
| 3.7          | Dock10              | 1089        | 1009        | n.s.           | 907         | 843         | n.s.           | 998         | 926         | 1.08        | 93%         |
| 3.6          | Cntn4               | 751         | 889         | n.s.           | 625         | 553         | n.s.           | 688         | 721         | 0.95        | 105%        |
| 3.6          | Prkg2               | 960         | 926         | n.s.           | 727         | 848         | n.s.           | 844         | 887         | 0.95        | 105%        |
| 3.5          | Srpk3               | 163         | 187         | n.s.           | (253)       | (213)       | n.s.           | 208         | 200         | 1.04        | 96%         |
| 3.4          | Cbln2               | 347         | 305         | n.s.           | 444         | 299         | n.s.           | 396         | 302         | 1.31        | 76%         |
| 3.4          | Ptgir               | 397         | 543         | n.s.           | 591         | 639         | n.s.           | 494         | 591         | 0.84        | 120%        |
| 3.3          | Ntrk2               | 1342        | 1349        | n.s.           | 1288        | 1141        | n.s.           | 1315        | 1245        | 1.06        | 95%         |
| 3.1          | Dcamk13             | 609         | 603         | n.s.           | 797         | 742         | n.s.           | 703         | 672         | 1.05        | 96%         |
| 3.1          | Btdb11              | 1277        | 1173        | n.s.           | 1221        | 1142        | n.s.           | 1249        | 1158        | 1.08        | 93%         |
| 3.0          | Isl2                | 1688        | 2091        | n.s.           | 1846        | 2349        | n.s.           | 1767        | 2220        | 0.80        | 126%        |
| <b>3.0</b>   | <b>Trpv1</b>        | <b>1182</b> | <b>620</b>  | <b>0.99998</b> | <b>908</b>  | <b>504</b>  | <b>0.99991</b> | <b>1045</b> | <b>562</b>  | <b>1.86</b> | <b>54%</b>  |
| <b>2.9</b>   | <b>Htr3a</b>        | <b>1162</b> | <b>995</b>  | <b>0.99956</b> | <b>1020</b> | <b>596</b>  | <b>0.99923</b> | <b>1091</b> | <b>795</b>  | <b>1.37</b> | <b>73%</b>  |
| <b>2.8</b>   | <b>Akap7</b>        | <b>1487</b> | <b>1137</b> | <b>0.99997</b> | <b>1174</b> | <b>923</b>  | <b>0.99987</b> | <b>1330</b> | <b>1030</b> | <b>1.29</b> | <b>77%</b>  |
| 2.8          | Pde10a              | 1211        | 1090        | n.s.           | 828         | 827         | n.s.           | 1019        | 958         | 1.06        | 94%         |
| 2.8          | Rgs10               | 3996        | 3578        | n.s.           | 3871        | 3678        | n.s.           | 3934        | 3628        | 1.08        | 92%         |
| 2.8          | Hmx1                | 1133        | 902         | 0.99665        | 1232        | 1003        | n.s.           | 1182        | 952         | 1.24        | 81%         |
| 2.6          | Etv1                | 404         | 237         | n.s.           | 450         | 234         | n.s.           | 427         | 235         | 1.81        | 55%         |
| 2.0          | Prrxl1              | 6662        | 6057        | n.s.           | 5820        | 5243        | n.s.           | 6241        | 5650        | 1.10        | 91%         |

**Other decreased transcripts identified in E14.5 TG of *Islet1*<sup>MCM/F</sup> embryos:**

|                  |                   |      |      |         |      |       |         |      |      |      |     |
|------------------|-------------------|------|------|---------|------|-------|---------|------|------|------|-----|
| Abs <sup>2</sup> | Htr3b             | 308  | 186  | 0.99956 | 483  | (113) | 0.99989 | 396  | 149  | 2.65 | 38% |
| 1.4              | Isl1 <sup>3</sup> | 9229 | 3733 | 0.99998 | 8770 | 3954  | 0.99998 | 8999 | 3844 | 2.34 | 43% |
| 0.4              | Synpr             | 1790 | 723  | 0.99998 | 1261 | 598   | 0.99997 | 1526 | 661  | 2.31 | 43% |
| Abs              | Scn11a            | 537  | 263  | 0.99995 | 500  | 255   | 0.99976 | 519  | 259  | 2.00 | 50% |
| Abs              | Grm7              | 1208 | 624  | 0.99998 | 822  | 508   | 0.99997 | 1015 | 566  | 1.79 | 56% |
| Abs              | Rasgrp1           | 376  | 262  | 0.99923 | 372  | (173) | 0.99993 | 374  | 218  | 1.72 | 58% |
| 2.1              | Lxn               | 7110 | 4144 | 0.99998 | 5547 | 3534  | 0.99998 | 6329 | 3839 | 1.65 | 61% |
| 2.1              | Ak5               | 1546 | 907  | 0.99998 | 1226 | 779   | 0.99998 | 1386 | 843  | 1.64 | 61% |
| 1.6              | Rgs4              | 2861 | 1970 | 0.99998 | 2650 | 1965  | 0.99998 | 2756 | 1968 | 1.40 | 71% |
| 1.3              | Ldb2              | 2404 | 1825 | 0.99998 | 1741 | 1164  | 0.99998 | 2073 | 1494 | 1.39 | 72% |

**Supplementary Table 2. Expression of transcripts in the E14.5 TG of *Islet1*<sup>MCM/F</sup> tamoxifen-induced (IKO) embryos, ranked by the order of transcripts most decreased in E12.5 CKO ganglia.**

Expression of the transcripts most decreased in E12.5 CKO DRG (Table 2) were examined in the IKO trigeminal at E14.5. In addition to all genes exhibiting the highest fold changes in the E12.5 CKO DRG, further decreased transcripts are listed which were detected as highly changed at E14.5, some of which were not yet expressed in the E12.5 DRG. Embryos were induced and harvested as described in Table S1. Values in parentheses are absent calls. Corresponding gene names appear in Table 2.

<sup>1</sup>Probe set appears to have high background.

<sup>2</sup>Absent in E12.5 DRG.

<sup>3</sup>Probe set does not detect *Islet1* exon 4 which is flanked by *LoxP* site, and underestimates extent of *Islet1* knockdown.

Gene names not shown in Table 2: **Htr3b**, 5-hydroxytryptamine (serotonin) receptor 3B; **Isl1**, ISL1 transcription factor, LIM/homeodomain; **Synpr**, synaptoporin; **Scn11a**, sodium channel, voltage-gated, type XI, alpha; Nav1.9; NaN; **Grm7**, glutamate receptor, metabotropic 7; **Rasgrp1**, RAS guanyl releasing protein 1; **Lxn**, latexin; **Ak5**, adenylate kinase 5; **Rgs4**, regulator of G-protein signaling 4; **Ldb2**, LIM domain binding 2.

### Supplementary Table 3

#### Oligonucleotide primers

| Name                                       | Sequence                                                       | Amplicon         |
|--------------------------------------------|----------------------------------------------------------------|------------------|
| <b>Conventional genotyping primers</b>     |                                                                |                  |
| Islet1 <sup>F</sup> 5'                     | GGTCTCTGGAACATCCCACAT                                          | 202 WT<br>297 KO |
| Islet1 <sup>F</sup> 3'                     | CTGTTCTACTCCCCATTCACT                                          |                  |
| Wnt1-Cre 5'                                | CCGGGCTGCCACGACCAA                                             |                  |
| Wnt1-Cre 3'                                | GGCGCGGCAACACCATTTTT                                           |                  |
| <b>Real-time genotyping primers</b>        |                                                                | All <100         |
| Islet1 constitutive targeted allele, WT 5' | CCCTCTCAGTCCCTTGCATC                                           |                  |
| Islet1 WT 3'                               | TTTCTCAGCCTCTGGGTGGA                                           |                  |
| Islet1 KO 5'                               | CAGAATAAAACGCACGGGTGT                                          |                  |
| Islet1 KO 3'                               | CCTTAGCAGGGCTAGGGAGG                                           |                  |
| Cre recombinase 5'                         | TGGGCCAGCTAAACATGCTT                                           |                  |
| Cre recombinase 3'                         | AACAGCATTGCTGTCACTTGGT                                         |                  |
| <b>qRT-PCR primers</b>                     |                                                                | All <100         |
| Islet1 Exon1 5'                            | GGGCCACTATTTGCCACCTA                                           |                  |
| Exon1 3'                                   | TGGTTGGACAATTGGTGAATAGC                                        |                  |
| Exon3 5'                                   | CCCTCTCAGTCCCTTGCATC                                           |                  |
| Exon4 3'                                   | TGGTCTTCTCCGGCTGCTT                                            |                  |
| Exon6 5'                                   | TGACTCCTGTCTGTCCAAGAACTT                                       |                  |
| Exon6 3'                                   | TTCTTTTTCTCTTTATTTCCAGAA                                       |                  |
| Cytochrome C oxidase                       | Proprietary CyC1 primer set (Applied Biosystems Mm00470540_m1) |                  |

## Supplementary methods

**Transgenic lines.** Mice bearing a floxed allele of the *Islet1* gene were generated as described in Methods. The Neomycin resistance cassette was removed from the transgene by crossing *Islet1<sup>F/+</sup>* mice to a *FLPeR* deleter strain<sup>1</sup>.

To delete *Islet1* specifically in neural crest cell and its derivatives, we interbred *Islet1<sup>F/F</sup>* mice with *Wnt1-Cre* mice<sup>2,3</sup> to generate mice with the genotype *Islet1<sup>F/+</sup>, Wnt1-Cre*. Crossing *Islet1<sup>F/+</sup>, Wnt1-Cre/Wnt1-Cre* mice with *Islet1<sup>F/F</sup>* mice yielded equal numbers of *Islet1<sup>F/F</sup>, Wnt1-Cre* (CKO) and *Islet1<sup>F/+</sup>, Wnt1-Cre* (control) embryos. The cre-deleter strain employed for these studies is a conventional transgenic *Wnt1-cre*, which has been shown to mediate *loxP* recombination in the dorsal neural tube and neural crest<sup>4</sup>. Because *Wnt1-cre* activity is present in the neural tube by E8.5<sup>2</sup>, prior to the onset of *Islet1* expression in the sensory ganglia, *Islet1<sup>F/F</sup>, Wnt1-cre* neurons should never express *Islet1*.

For late excision experiments, *Islet1<sup>MCM/+</sup>* mice were interbred with *Islet1<sup>F/F</sup>* mice to generate litters with equal numbers of *Islet1<sup>MCM/F</sup>* inducible knockouts (IKO) and *Islet1<sup>F/+</sup>* controls. To induce excision in *Islet1<sup>MCM/F</sup>* embryos, pregnant females were given an oral gavage of 300µl of tamoxifen in sesame oil (10mg/ml) at E11.5 and were harvested at E14.5 or E18.5.

For all experiments, *Islet1<sup>F/F</sup>* mice were maintained homozygous for a *Rosa26-LacZ* reporter gene. In *ROSA26-LacZ* mice, cre-mediated removal of a transcriptional termination cassette allows constitutive expression of beta-galactosidase, marking all cells in which Cre recombinase has been active, and permitting cell lineage and axon tracing<sup>5</sup>.

Animal experiments were conducted under protocols approved by the UCSD Animal Care Program and the Veterinary Medical Unit of the San Diego VA Medical Center.

**Mating, fixation, X-gal staining.** Following matings, noon of the day of the appearance of a mucous plug was taken to be embryonic day 0.5 (E0.5) of gestation. Embryos were also staged according to the system of Theiler<sup>6</sup>. Embryos harvested at different time points of gestation were fixed for 1-2 hours in 4% PFA, using the longer period for later stage embryos. To optimize tissue fixation and penetration of the X-gal substrate, the chest and abdomen were opened before fixation. At E18.5 and P1 the spinal column and attached DRG were dissected and fixed 3 hours. Embryos were stained several hours to overnight at 37°C in X-gal substrate solution consisting of 5 mM  $K_4Fe(CN)_6$ , 5 mM  $K_3Fe(CN)_6$ , 2 mM  $MgCl_2$ , 0.01% NP-40, 0.1% deoxycholate, and 0.1% X-gal (Roche Molecular, Indianapolis) in PBS.

**Immunostaining and axonal labeling.** For immunostaining embryos or tissues were fixed for 1-3 hours in 4% PFA, embedded in OCT, and sectioned at 15 $\mu$ m. Immunofluorescence was performed with the following primary antibodies: mouse monoclonal anti-Islet1/2 (DSHB), guinea pig anti-Islet 2 (gift of S. Pfaff), rabbit anti-TrkA (gift of L. Reichardt), goat anti-TrkB and anti-TrkC (R&D Systems), goat anti-cRet (IBL), rabbit anti-Runx1 and anti-Islet1 (gifts of T. Jessell) rabbit anti-Runx3 and rabbit anti-Etv1/Er81 (Gifts of S. Arber), Guinea pig anti Sox 10 (gift of M. Wegner),<sup>7</sup> rabbit anti-Brn3a<sup>8</sup> and guinea pig anti-Brn3a<sup>9</sup>. Following incubation with the primary antibody, sections were washed then incubated with the appropriate secondary antibodies

fluorescently labeled with Alexa 488 or 594 (Invitrogen), and mounted in Vectashield (Vector Laboratories).

Caspase-3 expression, a measure of apoptotic cell death, was measured by immunofluorescence using rabbit anti-caspase-3 (Cell Signal Tech. #9661) Cryostat sections of the DRG and TG of the appropriated developmental stages were cut at 10 $\mu$ m, and every fourth section was stained and the caspase3<sup>+</sup> cells were counted. At least five sections were analyzed per ganglion, and the mean and SD of the counts determined. A two-tailed T-test was used to determine the significance of differences in apoptotic cell number between control and *Islet1* CKO ganglia.

**Microarray and qPCR analysis.** Microarray analysis was performed using cervical DRG from E12.5 embryos of genotype *Islet1*<sup>F/F</sup>, *Wnt1-Cre* (CKO) and *Islet1*<sup>F/F</sup>, *Wnt1-Cre* (control). The presence of a *Rosa26-LacZ* allele allowed the embryos expressing *Wnt1-Cre* to visually genotyped by rapid Xgal staining, and only the positive embryos were used for dissections. For studies of delayed excision, ganglia were harvested from tamoxifen-induced *Islet1*<sup>MCM/F</sup> (IKO) and *Islet1*<sup>F/+</sup> controls at E14.5. Each sample consisted of the pooled cervical/brachial-level DRG from four embryos, and two independent samples for each genotype were generated. Dissected ganglia were placed immediately in RNAlater (Qiagen) and stored overnight at 4C. The following day, RNAlater was removed and the ganglia were frozen at -80C until the completion of genotyping.

The ganglia from individual embryos with the same genotype were pooled at the time of RNA extraction. RNA was prepared using the RNeasy Mini kit (Qiagen) following the manufacturer's instructions. Prior to extraction the ganglia were



homogenized in the provided lysis buffer using an Eppendorf pestle, then processed with a QiaShredder column (Qiagen). The quality of the resulting RNA was verified by the relative intensity of rRNA bands using a Agilent 2100 Bioanalyzer, and RNA was quantified using a Nanodrop ND-1000 spectrophotometer.

For microarray analysis, aRNA was synthesized from  $0.5 \pm 0.1 \mu\text{g}$  of total RNA, using the Message Amp II kit (Ambion), following the manufacturer's instructions for a one-step amplification. Yields of biotin-labeled aRNA ranged from 75-100 $\mu\text{g}$  per sample, and 15 $\mu\text{g}$  was used for hybridization to Affymetrix Mouse Genome 430 2.0 array. For exon-specific qPCR analysis of Islet1 expression, 0.1 $\mu\text{g}$  of the aRNA used for microarray analysis was reverse-transcribed with the ThermoScript RT-PCR system (Invitrogen) using random hexamer priming following the manufacturer's instructions. Each PCR reaction used 1% of the resulting cDNA samples, and quantitative PCR was performed using SYBR green detection. Primer pairs for exon specific PCR appear in Table S3.

**In situ hybridization.** Methods used for non-isotopic in situ hybridization and probes for mouse NeuroD4 and Tcfap2b<sup>10</sup>, mouse Lhx1 (Lim1)<sup>11</sup>, and rat Lhx2 (Lh2a, effective in mouse)<sup>12</sup>, and Lbxcor1<sup>13</sup> have been described.

**Statistical methods.** Statistical analysis of microarray data was performed using Mas 5.0 software (Affymetrix) as previously described<sup>10</sup>. Statistical tests used for cell counts are described in the corresponding figure legends.

### Supplemental references

1. Farley, F.W., Soriano, P., Steffen, L.S. & Dymecki, S.M. Widespread recombinase expression using FLPeR (flipper) mice. *Genesis* **28**, 106-110 (2000).

2. Danielian, P.S., Muccino, D., Rowitch, D.H., Michael, S.K. & McMahon, A.P. Modification of gene activity in mouse embryos in utero by a tamoxifen-inducible form of Cre recombinase. *Curr Biol* **8**, 1323-1326 (1998).
3. Jiang, X., Rowitch, D.H., Soriano, P., McMahon, A.P. & Sucov, H.M. Fate of the mammalian cardiac neural crest. *Development* **127**, 1607-1616 (2000).
4. Chai, Y., *et al.* Fate of the mammalian cranial neural crest during tooth and mandibular morphogenesis. *Development* **127**, 1671-1679 (2000).
5. Soriano, P. Generalized lacZ expression with the ROSA26 Cre reporter strain. *Nat Genet* **21**, 70-71 (1999).
6. Theiler, K. *The house mouse; development and normal stages from fertilization to 4 weeks of age* (Springer-Verlag, Berlin, New York, 1972).
7. Maka, M., Stolt, C.C. & Wegner, M. Identification of Sox8 as a modifier gene in a mouse model of Hirschsprung disease reveals underlying molecular defect. *Dev Biol* **277**, 155-169 (2005).
8. Fedtsova, N. & Turner, E. Brn-3.0 Expression identifies early post-mitotic CNS neurons and sensory neural precursors. *Mechanisms of Development* **53**, 291-304 (1995).
9. Quina, L.A., *et al.* Brn3a-expressing retinal ganglion cells project specifically to thalamocortical and collicular visual pathways. *J Neurosci* **25**, 11595-11604 (2005).
10. Eng, S.R., Lanier, J., Fedtsova, N. & Turner, E.E. Coordinated regulation of gene expression by Brn3a in developing sensory ganglia. *Development* **131**, 3859-3870 (2004).
11. Barnes, J.D., Crosby, J.L., Jones, C.M., Wright, C.V. & Hogan, B.L. Embryonic expression of Lim-1, the mouse homolog of Xenopus Xlim-1, suggests a role in lateral mesoderm differentiation and neurogenesis. *Dev Biol* **161**, 168-178 (1994).
12. Xu, Y., *et al.* LH-2: a LIM/homeodomain gene expressed in developing lymphocytes and neural cells. *Proc Natl Acad Sci U S A* **90**, 227-231 (1993).
13. Mizuhara, E., Nakatani, T., Minaki, Y., Sakamoto, Y. & Ono, Y. Corl1, a novel neuronal lineage-specific transcriptional corepressor for the homeodomain transcription factor Lbx1. *J Biol Chem* **280**, 3645-3655 (2005).
